# Supplementary material for: Clinical Validation of a Machine-Learned, Point-of-Care System to IDENTIFY Functionally Significant Coronary Artery Disease
Source: MDPI journal article supplement (doi:10.3390/diagnostics14100987), 2024-05-08
Supplement: s1 [file s1]

## Supplementary Section S1 – STARD Checklist

Table S1 - STARD Checklist.

| Section & Topic          | No  | Item                                                                                                                                                   | Reported on page #         |
|--------------------------|-----|--------------------------------------------------------------------------------------------------------------------------------------------------------|----------------------------|
| <b>TITLE OR ABSTRACT</b> |     |                                                                                                                                                        |                            |
|                          | 1   | Identification as a study of diagnostic accuracy using at least one measure of accuracy (such as sensitivity, specificity, predictive values, or AUC)  | 1                          |
| <b>ABSTRACT</b>          |     |                                                                                                                                                        |                            |
|                          | 2   | Structured summary of study design, methods, results, and conclusions (for specific guidance, see STARD for Abstracts)                                 | 1                          |
| <b>INTRODUCTION</b>      |     |                                                                                                                                                        |                            |
|                          | 3   | Scientific and clinical background, including the intended use and clinical role of the index test                                                     | 2-3                        |
|                          | 4   | Study objectives and hypotheses                                                                                                                        | 3                          |
| <b>METHODS</b>           |     |                                                                                                                                                        |                            |
| Study design             | 5   | Whether data collection was planned before the index test and reference standard were performed (prospective study) or after (retrospective study)     | 4                          |
| Participants             | 6   | Eligibility criteria                                                                                                                                   | 3, Supplement Section S2   |
|                          | 7   | On what basis potentially eligible participants were identified (such as symptoms, results from previous tests, inclusion in registry)                 | 3-5                        |
|                          | 8   | Where and when potentially eligible participants were identified (setting, location and dates)                                                         | Supplement Section S3      |
| Test methods             | 9   | Whether participants formed a consecutive, random or convenience series                                                                                | 3                          |
|                          | 10a | Index test, in sufficient detail to allow replication                                                                                                  | 4                          |
|                          | 10b | Reference standard, in sufficient detail to allow replication                                                                                          | 4-5                        |
|                          | 11  | Rationale for choosing the reference standard (if alternatives exist)                                                                                  | 2-3                        |
|                          | 12a | Definition of and rationale for test positivity cut-offs or result categories of the index test, distinguishing pre-specified from exploratory         | 4                          |
|                          | 12b | Definition of and rationale for test positivity cut-offs or result categories of the reference standard, distinguishing pre-specified from exploratory | 5                          |
|                          | 13a | Whether clinical information and reference standard results were available to the performers/readers of the index test                                 | 6                          |
|                          | 13b | Whether clinical information and index test results were available to the assessors of the reference standard                                          | 6                          |
| Analysis                 | 14  | Methods for estimating or comparing measures of diagnostic accuracy                                                                                    | 5-6                        |
|                          | 15  | How indeterminate index test or reference standard results were handled                                                                                | 5-6                        |
|                          | 16  | How missing data on the index test and reference standard were handled                                                                                 | 5-6                        |
|                          | 17  | Any analyses of variability in diagnostic accuracy, distinguishing pre-specified from exploratory                                                      | n/a                        |
|                          | 18  | Intended sample size and how it was determined                                                                                                         | 6                          |
| <b>RESULTS</b>           |     |                                                                                                                                                        |                            |
| Participants             | 19  | Flow of participants, using a diagram                                                                                                                  | Supplement Section S5 & S6 |
|                          | 20  | Baseline demographic and clinical characteristics of participants                                                                                      | Table 1                    |
|                          | 21a | Distribution of severity of disease in those with the target condition                                                                                 | 6                          |
|                          | 21b | Distribution of alternative diagnoses in those without the target condition                                                                            | Table 1                    |
|                          | 22  | Time interval and any clinical interventions between index test and reference standard                                                                 | 5-6                        |
| Test results             | 23  | Cross tabulation of the index test results (or their distribution) by the results of the reference standard                                            | Table 2                    |
|                          | 24  | Estimates of diagnostic accuracy and their precision (e.g. 95% confidence intervals)                                                                   | 8, Table 2                 |
|                          | 25  | Any adverse events from performing the index test or the reference standard                                                                            | 7                          |
| <b>DISCUSSION</b>        |     |                                                                                                                                                        |                            |
|                          | 26  | Study limitations, including sources of potential bias, statistical uncertainty, and generalizability                                                  | 12                         |
|                          | 27  | Implications for practice, including the intended use and clinical role of the index test                                                              | 12                         |
| <b>OTHER INFORMATION</b> |     |                                                                                                                                                        |                            |
|                          | 28  | Registration number and name of registry                                                                                                               | 3                          |
|                          | 29  | Where the full study protocol can be accessed                                                                                                          | 3                          |
|                          | 30  | Sources of funding and other support; role of funders                                                                                                  | 12                         |

## Supplementary Section S2 – Inclusion/Exclusion Criteria

Table S2 - Inclusion/Exclusion Criteria.

| Inclusion                                                                                                                     | Exclusion                                                                                                                                                                       |
|-------------------------------------------------------------------------------------------------------------------------------|---------------------------------------------------------------------------------------------------------------------------------------------------------------------------------|
| ≥ 18 years of age                                                                                                             | Prior documented history of myocardial infarction (MI)                                                                                                                          |
| Cardiovascular symptoms                                                                                                       | Suspected acute myocardial infarction (AMI) at current presentation                                                                                                             |
| Scheduled to undergo cardiac catheterization with coronary angiography (Group 2) or Computed Tomography Angiography (Group 4) | Prior coronary artery bypass grafting (CABG)                                                                                                                                    |
| Ability to understand the requirements of the study and to provide written informed consent                                   | Prior heart valve replacement                                                                                                                                                   |
|                                                                                                                               | Previous sustained or paroxysmal atrial or ventricular arrhythmia                                                                                                               |
|                                                                                                                               | Infiltrative myocardial disease (amyloid, sarcoid, right ventricular dysplasia)                                                                                                 |
|                                                                                                                               | Presence of cardiac implantable electronic device (CIED), including implantable cardioverter defibrillator (ICD), pacemaker (PM), implantable loop recorders and other monitors |
|                                                                                                                               | Implantable Neuro-stimulators                                                                                                                                                   |
|                                                                                                                               | Congenital Heart Disease                                                                                                                                                        |
|                                                                                                                               | Pregnant or breast feeding                                                                                                                                                      |
|                                                                                                                               | Currently taking any Type IA, IC or III antiarrhythmics                                                                                                                         |
|                                                                                                                               | Any history of amiodarone use                                                                                                                                                   |
|                                                                                                                               | Clinically significant chest deformity (e.g., pectus excavatum or pectus carinatum)                                                                                             |
|                                                                                                                               | Breast implants                                                                                                                                                                 |
|                                                                                                                               | Neuromuscular disease if the condition results in tremor or muscle fasciculations                                                                                               |

## Supplemental Section S3 – Clinical study sites and locations.

Table S3 - Clinical study sites and locations.

| Site Name                                         | Location          | Site Used in Development | Site Used in Validation |
|---------------------------------------------------|-------------------|--------------------------|-------------------------|
| Atlanta Heart Specialists                         | Tucker, GA        | Yes                      | Yes                     |
| Cone Health Heart and Vascular Center             | Greensboro, NC    | Yes                      | Yes                     |
| Novant Health New Hanover Regional Medical Center | Wilmington, NC    | Yes                      | Yes                     |
| Rochester General Hospital                        | Rochester, NY     | Yes                      | Yes                     |
| Bryan Heart                                       | Lincoln, NE       | Yes                      | Yes                     |
| Piedmont Healthcare                               | Atlanta, GA       | Yes                      | Yes                     |
| Austin Heart                                      | Austin, TX        | Yes                      | Yes                     |
| Cardiovascular Associates of the Southeast        | Birmingham, AL    | Yes                      | No                      |
| Sentara Hospital and Medical Group                | Norfolk, VA       | Yes                      | Yes                     |
| North Georgia Medical Center                      | Gainesville, GA   | Yes                      | No                      |
| Jacobs Institute                                  | Buffalo, NY       | Yes                      | No                      |
| Lexington Medical Center Heart & Vascular         | West Columbia, SC | Yes                      | Yes                     |
| Ochsner Medical Foundation                        | Jefferson, LA     | Yes                      | No                      |
| Advent Health Tampa                               | Tampa, FL         | No                       | Yes                     |
| Cardiovascular Institute of the South (Houma)     | Houma, LA         | Yes                      | Yes                     |
| Cardiovascular Institute of the South (Lafayette) | Lafayette, LA     | Yes                      | Yes                     |
| Jackson Heart Clinic                              | Jackson, MS       | Yes                      | Yes                     |
| Oklahoma Heart Hospital                           | Oklahoma City, OK | Yes                      | Yes                     |
| WellStar Research Institute                       | Marietta, GA      | Yes                      | Yes                     |
| Cardiology Associates of North Mississippi        | Tupelo, MS        | Yes                      | Yes                     |
| Medical University of South Carolina              | Charleston, SC    | No                       | Yes                     |
| Minneapolis Heart                                 | Minneapolis, MN   | No                       | Yes                     |
| Alamance Regional Medical Center                  | Burlington, NC    | No                       | Yes                     |
| Lundquist Institute                               | Torrance, CA      | No                       | Yes                     |

## Supplemental Section S4 – CONSORT Flow for IDENTIFY Group 2

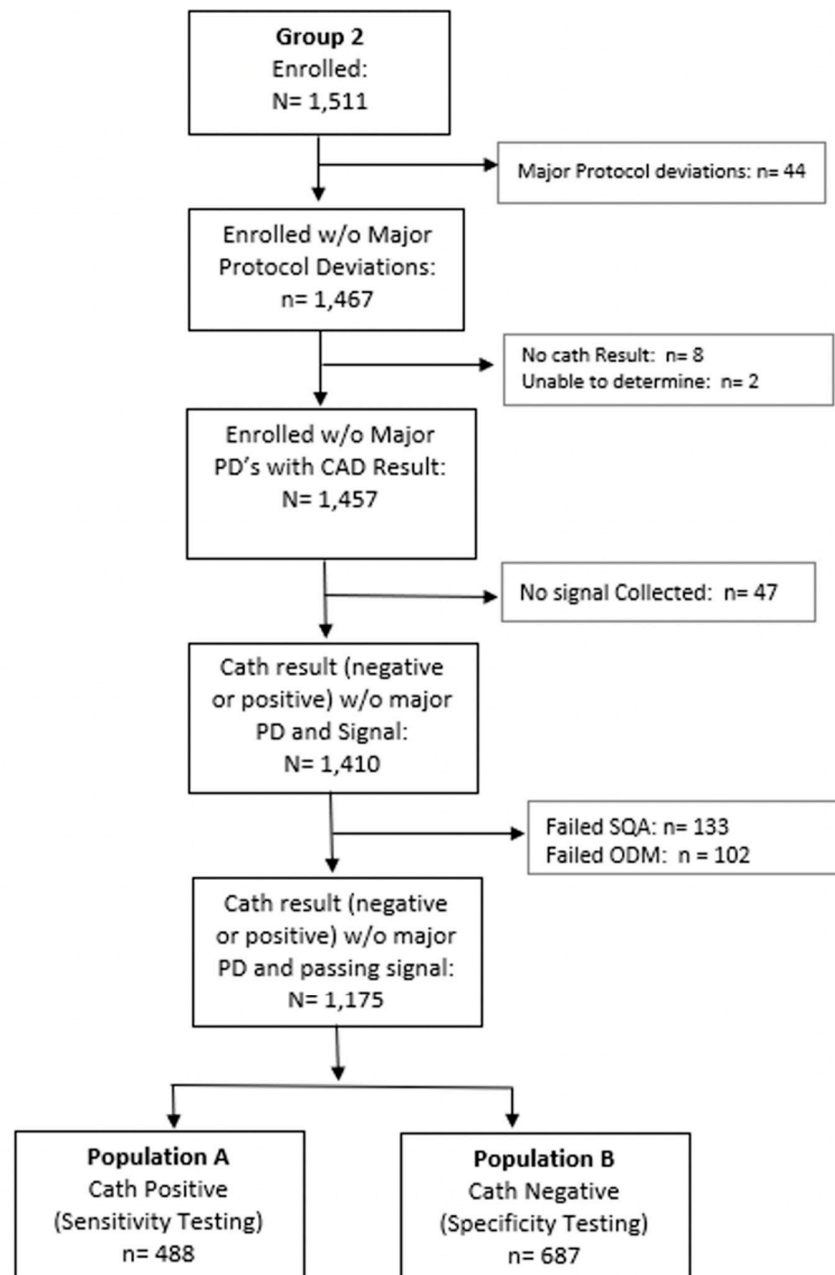

Figure S1 - CONSORT Flow for IDENTIFY Group 2.

## Supplemental Section S5 – CONSORT Flow for IDENTIFY Group 4

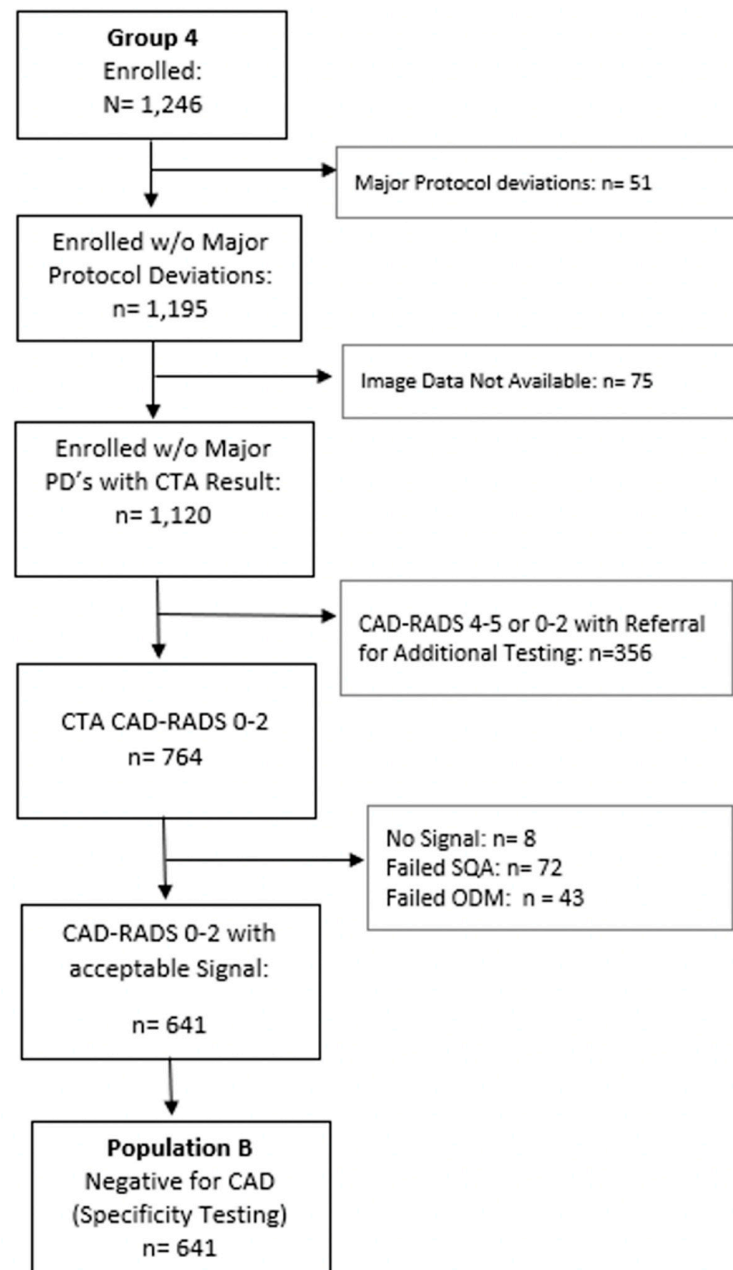

Figure S2 - CONSORT Flow for IDENTIFY Group 4

## Supplemental Section S6 – Relevance of CAD Score Beyond Binary Results

The test-negative and test-positive ranges of the CAD Score were divided into tertiles (i.e., three ranges, each with an equal number of subjects). For this analysis, the Group 2 subjects in Population B were excluded, due to the minimal effect on specificity (Group 4 specificity of 60% is not substantially affected when including the Group 2 subjects, reducing only to 58%).

The negative and positive likelihood ratios were calculated for each tertile assuming that the score range represents the entire test-negative or test-positive range, respectively.

The results with the unmodified thresholds are shown in Table 4. The following tables reflect the adjustment of the female threshold described in the discussion.

Table S4 – Score ranges and likelihood ratios for test-negative and test-positives for each tertile.

| Test-Negative |                  |                           |
|---------------|------------------|---------------------------|
| Tertile       | Score Range      | Negative Likelihood Ratio |
| Tertile 1     | (-0.401, -0.122) | 0.129                     |
| Tertile 2     | (-0.121, -0.058) | 0.220                     |
| Tertile 3     | (-0.057, -0.001) | 0.340                     |
| Test-Positive |                  |                           |
| Tertile       | Score Range      | Positive Likelihood Ratio |
| Tertile 1     | (0.000, 0.100)   | 1.446                     |
| Tertile 2     | (0.101, 0.199)   | 1.913                     |
| Tertile 3     | (0.200, 0.644)   | 2.888                     |

## Supplemental Section S7 – Comparison Between Development and Validation Key Demographics

Table S5 – Comparison of Population A

| Characteristic                          | Development (n=641) | Validation (n=488) | p-value |
|-----------------------------------------|---------------------|--------------------|---------|
| Age at consent                          |                     |                    |         |
| Mean $\pm$ SD                           | 64.9 $\pm$ 9.6      | 66.1 $\pm$ 9.2     | 0.0344  |
| <65                                     | 43.7% (280/641)     | 40.6% (198/488)    | 0.3240  |
| $\geq$ 65                               | 56.3% (361/641)     | 59.4% (290/488)    |         |
| Sex                                     |                     |                    |         |
| Female                                  | 26.7% (171/641)     | 30.9% (151/488)    | 0.1321  |
| Male                                    | 73.3% (470/641)     | 69.1% (337/488)    |         |
| BMI                                     |                     |                    |         |
| Mean $\pm$ SD                           | 30.9 $\pm$ 6.2      | 30.7 $\pm$ 6.1     | 0.5888  |
| <30                                     | 45.7% (293/641)     | 50.5% (246/487)    | <0.05   |
| $\geq$ 30                               | 54.3% (348/641)     | 49.5% (241/487)    |         |
| Hypertension                            | 78.6% (504/641)     | 77.9% (380/488)    | 0.8155  |
| Diabetes                                | 34.5% (221/641)     | 38.9% (190/488)    | 0.1390  |
| Hypercholesterolemia/<br>Hyperlipidemia | 76.6% (491/641)     | 83.6% (408/488)    | 0.0048  |

Table S6 – Comparison of Population B

| Characteristic                          | Development (n=513) | Validation (n=641)* | p-value |
|-----------------------------------------|---------------------|---------------------|---------|
| Age at consent                          |                     |                     |         |
| Mean $\pm$ SD                           | 55.0 $\pm$ 12.0     | 54.7 $\pm$ 11.3     | 0.6630  |
| <65                                     | 77.0% (395/513)     | 78.3% (502/641)     | 0.6432  |
| $\geq$ 65                               | 23.0% (118/513)     | 21.7% (139/641)     |         |
| Sex                                     |                     |                     |         |
| Female                                  | 64.5% (331/513)     | 64.1% (411/641)     | 0.9359  |
| Male                                    | 35.5% (182/513)     | 35.9% (230/641)     |         |
| BMI                                     |                     |                     |         |
| Mean $\pm$ SD                           | 31.3 $\pm$ 6.6      | 32.4 $\pm$ 7.1      | 0.0071  |
| <30                                     | 47.8% (245/513)     | 41.3% (265/641)     | 0.0339  |
| $\geq$ 30                               | 52.2% (268/513)     | 58.7% (376/641)     |         |
| Hypertension                            | 60.0% (308/513)     | 59.3% (380/641)     | 0.8415  |
| Diabetes                                | 15.8% (81/513)      | 19.2% (123/641)     | 0.1537  |
| Hypercholesterolemia/<br>Hyperlipidemia | 52.6% (270/513)     | 58.5% (375/641)     | 0.0528  |

\* CCTA (Group 4) only, since subjects without CAD from ICA were not used in training.

## Supplementary Section S8 – Distribution of Age and BMI in the Validation Population

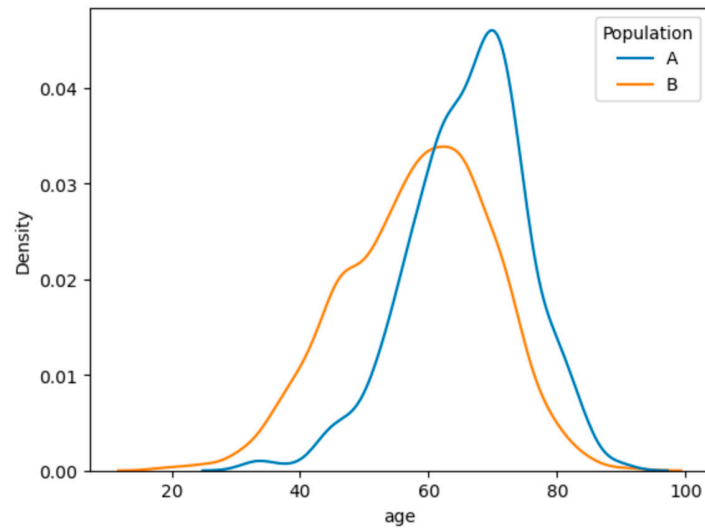

Figure S3 – Distribution of Age

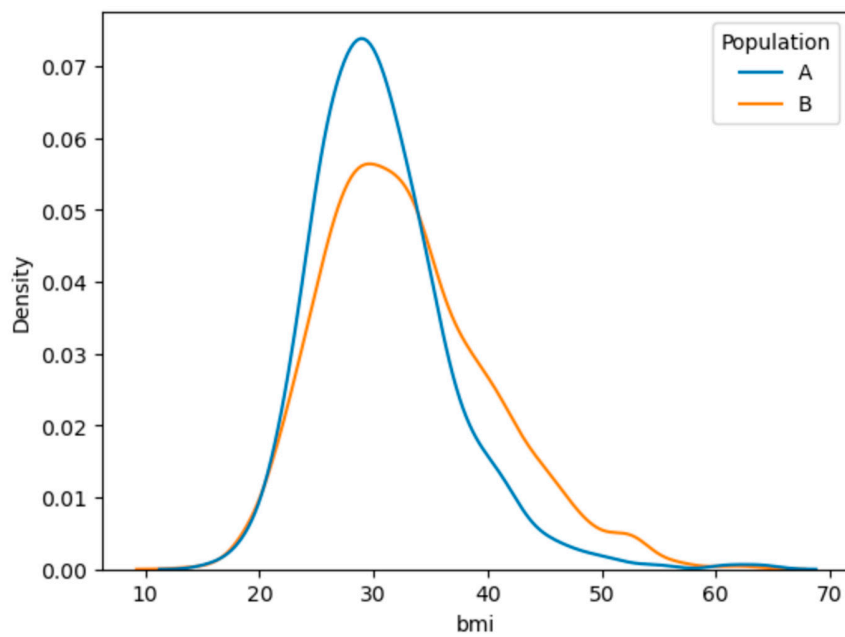

Figure S4 – Distribution of BMI
